# Supplementary material for: Characteristics of JN.1-derived SARS-CoV-2 subvariants SLip, FLiRT, and KP.2 in neutralization escape, infectivity and membrane fusion
Source: PubMed Central journal article supplement — bioRxiv. 2024 May 21:2024.05.20.595020. Preprint. [Version 1] doi: 10.1101/2024.05.20.595020 (PMC11142104; doi:10.1101/2024.05.20.595020), 2024-05-21
Supplement: media-1.pdf [file media-1.pdf]

**Table S1. Bivalent-vaccinated HCW and BA.2.86/JN.1-wave first responder cohorts**

|                                                           | <b>Bivalent Health Care Workers</b><br>(n=10) | <b>BA.2.86/JN.1 Wave Patients</b><br>(n=7) |
|-----------------------------------------------------------|-----------------------------------------------|--------------------------------------------|
| <b>Age in Years at Sample Collection [Median (Range)]</b> | 37 (27-46)                                    | 51 (35-77)                                 |
| <b>Gender [n (% of Total)]</b>                            |                                               |                                            |
| Male                                                      | 5 (50%)                                       | 3 (42.9%)                                  |
| Female                                                    | 5 (50%)                                       | 4 (57.1%)                                  |
| <b>Sample Collection Window</b>                           | Dec. 2022- Jan.2023                           | Nov. 2023-Feb.2024                         |
| <b>Vaccine status [n (% of Total)]</b>                    |                                               |                                            |
| 2-dose Moderna                                            | NA                                            | 2 (28.6%)                                  |
| 3-dose Moderna                                            | NA                                            | 1 (14.3%)                                  |
| 4-dose Moderna                                            | NA                                            | 1 (14.3%)                                  |
| 1-dose Moderna +1-dose Pfizer bivalent                    | NA                                            | 1 (14.3%)                                  |
| 2-dose Pfizer +1-dose Pfizer bivalent                     | 1 (10%)                                       | NA                                         |
| 3-dose Pfizer +1-dose Moderna bivalent                    | NA                                            | 1 (14.3%)                                  |
| 3-dose Pfizer +1-dose Pfizer bivalent                     | 3 (30%)                                       | NA                                         |
| 3-dose Pfizer +1-dose Moderna                             | 1 (10%)                                       | NA                                         |
| 3-dose Moderna +1-dose Moderna bivalent                   | 4 (40%)                                       | 1 (14.3%)                                  |
| 2-dose Moderna +1 Pfizer +1-dose Pfizer bivalent          | 1 (10%)                                       | NA                                         |
| Days from last vaccination                                | NA                                            | 434 (34-892)                               |
| Days post the bivalent dose for recipients                | 66 (23-108)                                   | NA                                         |
| <b>COVID-19 positive [n (% of Total)]</b>                 | 8 (80%)                                       | 7 (100%)                                   |
| Days before sample collection [(Median Range)]            | 276.5 (182-994)                               | 7 (3-10)                                   |
| <b>Infected Variants</b>                                  |                                               |                                            |
| JN.1/BA.2.86                                              | NA                                            | 2 (28.6%)                                  |
| Undetermined                                              | NA                                            | 5 (71.4%)                                  |

Summary of the demographic information for two cohorts used for neutralization experiments depicted in Figure 2. “NA” means the category is not applicable to the cohort.
